# Supplementary material for: Aqueous Dispersions of Silica Stabilized with Oleic Acid Obtained by Green Chemistry
Source: MDPI journal article supplement (doi:10.3390/nano6010009), 2016-01-05
Supplement: s1 [file s1]

## Supplementary Material

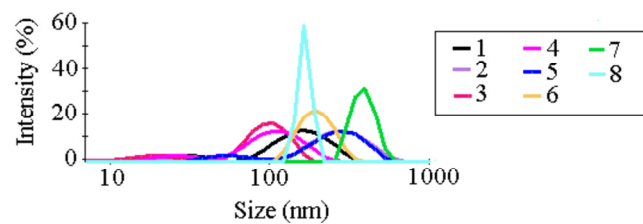

**Figure S1.** Size distribution by intensity for the dispersions prepared with different quantities of OLA and a fixed amount of sodium silicate (1. 0.125/1; 2. 0.25/1; 3. 0.5/1; 4. 1/1; 5. 1.5/1; 6. 2/1; 7. 3/1 and 8. 4/1 OLA/Na).

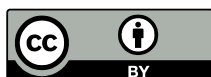

© 2016 by the authors; licensee MDPI, Basel, Switzerland. This article is an open access article distributed under the terms and conditions of the Creative Commons by Attribution (CC-BY) license (<http://creativecommons.org/licenses/by/4.0/>).
